# Supplementary material
Source: PubMed Central journal article supplement (PMC3081390)
Supplement: NIHMS245296-supplement-1_si_001.pdf [file NIHMS245296-supplement-1_si_001.pdf]

Table S1: Backbone chemical shifts of the extra peaks in the folded P protein HSQC spectrum.

| Residue | $^1\text{H}$<br>(ppm) | $^1\text{H}_\alpha$ (ppm) | $^{15}\text{N}$ (ppm) | $^{13}\text{C}_\alpha$ (ppm) | $^{13}\text{C}_\beta$ (ppm) | $^{13}\text{CO}$ (ppm) |
|---------|-----------------------|---------------------------|-----------------------|------------------------------|-----------------------------|------------------------|
| Leu 4   | 8.42                  | 4.27                      | 124.68                | 55.11                        | 42.35                       | 176.92                 |
| Lys 5   | 8.40                  | 4.23                      | 123.25                | 56.04                        | 32.93                       | 176.33                 |
| Lys 6   | 8.38                  | 4.18                      | 123.55                | 56.15                        | 32.92                       | 176.43                 |
| Arg 7   | 8.45                  | 4.26                      | 122.78                | 56.02                        | 30.75                       | 175.95                 |
| Asn 8   | 8.53                  | 4.62                      | 120.66                | 53.21                        | 38.83                       | 175.04                 |
| Arg 9   | 8.38                  | 4.23                      | 121.97                | 56.10                        | 30.59                       | 176.02                 |
| Leu 10  | 8.23                  | 4.24                      | 123.17                | 55.09                        | 42.16                       | 177.12                 |
| Lys 11  | 8.25                  | 4.24                      | 122.73                | 56.04                        | 32.92                       | 176.25                 |
| Lys 12  | 8.37                  | 4.20                      | 123.03                | 56.21                        | 32.92                       | 176.24                 |
| Asn 13  | 8.50                  | 4.56                      | 120.16                | 53.50                        | 38.60                       | 175.25                 |
| Glu 14  | 8.43                  | 4.18                      | 121.41                | 56.66                        | 30.12                       | 175.96                 |
| Asp 15  | 8.25                  | 4.46                      | 121.18                | 54.47                        | 40.84                       | 176.21                 |
| Phe 16  | 8.07                  | 4.47                      | 120.61                | 58.04                        | 39.18                       | 175.82                 |
| Gln 17  | 8.17                  | 4.17                      | 120.65                | 55.91                        | 29.16                       | 175.76                 |
| Lys 18  | 8.08                  | 4.09                      | 121.91                | 56.39                        | 32.82                       | 176.18                 |
| Val 19  | 7.89                  |                           | 120.61                | 62.03                        | 32.79                       | 175.59                 |
|         |                       |                           |                       |                              |                             |                        |
| Gly 23  | 8.45                  |                           | 110.18                | 45.19                        |                             |                        |
| Thr 24  | 8.12                  |                           | 113.70                | 61.65                        | 69.74                       | 174.10                 |
|         |                       |                           |                       |                              |                             |                        |
| Lys 52  | 8.15                  |                           | 121.82                | 61.96                        | 32.58                       | 175.56                 |
| Lys 53  | 8.30                  | 4.56                      | 124.33                | 57.36                        | 39.54                       | 175.37                 |
| Ile 54  | 8.20                  |                           | 123.39                | 55.99                        | 33.05                       | 175.86                 |
|         |                       |                           |                       |                              |                             |                        |
| Ala 91  | 8.47                  | 4.27                      | 124.59                | 52.83                        | 18.90                       | 178.03                 |
| Ser 92  | 8.24                  | 4.31                      | 114.30                | 58.30                        | 63.51                       | 174.54                 |
| Gln 93  | 8.31                  | 4.28                      | 122.09                | 55.79                        | 29.27                       | 175.86                 |
| Leu 94  | 8.14                  | 4.31                      | 123.06                | 55.43                        | 42.28                       | 177.62                 |
| Thr 95  | 8.16                  |                           | 114.01                | 61.65                        | 69.85                       | 174.71                 |
|         |                       |                           |                       |                              |                             |                        |

|         |      |      |        |       |       |        |
|---------|------|------|--------|-------|-------|--------|
| Glu 98  | 8.21 | 4.11 | 121.16 | 57.52 | 30.09 | 177.73 |
| Thr 99  | 8.18 | 4.09 | 115.73 | 63.62 | 69.19 | 175.32 |
| Lys 100 | 8.10 | 4.08 | 122.92 | 57.32 | 32.29 | 177.37 |
| Lys 101 | 8.03 | 4.09 | 120.92 | 57.33 | 32.59 | 177.34 |
| Ser 102 | 8.11 |      | 115.70 | 59.02 | 63.27 | 175.07 |
| Leu 103 | 8.07 | 4.25 | 123.14 | 55.53 | 41.99 | 177.71 |
| Gln 104 | 8.04 |      | 119.27 | 56.67 | 28.96 | 176.23 |
|         |      |      |        |       |       |        |
| Leu 106 | 7.94 | 4.09 | 122.12 | 55.43 | 42.10 | 177.07 |
| Phe 107 | 8.13 | 4.44 | 120.48 | 57.75 | 39.25 | 175.73 |
| Arg 108 | 8.06 |      | 122.59 | 55.99 | 30.75 | 175.95 |
| Lys 109 | 8.30 |      | 124.19 | 54.21 | 30.81 | 175.97 |
|         |      |      |        |       |       |        |
| Leu 112 | 8.04 | 4.18 | 123.32 | 55.53 | 42.14 | 176.93 |
| Tyr 113 | 7.93 | 4.46 | 120.35 | 57.69 | 38.60 | 175.30 |
| Lys 114 | 7.99 | 4.18 | 123.83 | 55.84 | 33.22 | 175.84 |
| Lys 115 | 8.28 | 4.23 | 123.54 | 56.29 | 33.02 | 176.59 |
| Ser 116 | 8.28 |      | 116.62 | 58.39 | 63.63 | 174.80 |
|         |      |      |        |       |       |        |
| Und1    | 8.09 |      | 121.45 | 62.27 | 32.64 | 176.21 |
| Und2    | 8.12 |      | 120.04 | 54.50 | 40.90 | 175.88 |
| Und3    | 8.41 |      | 121.29 | 57.54 | 30.06 | 177.19 |
| Und4    | 8.25 |      | 128.08 | 52.31 | 19.11 | 177.22 |
| Und5    | 7.87 |      | 119.73 | 57.90 | 38.59 | 175.45 |
| Und6    | 7.82 |      | 119.57 | 55.21 | 31.69 | 175.27 |
| Und7    | 7.86 |      | 122.28 | 61.13 | 38.41 | 175.46 |
| Und8    | 8.30 |      | 127.71 | 52.14 | 19.27 |        |

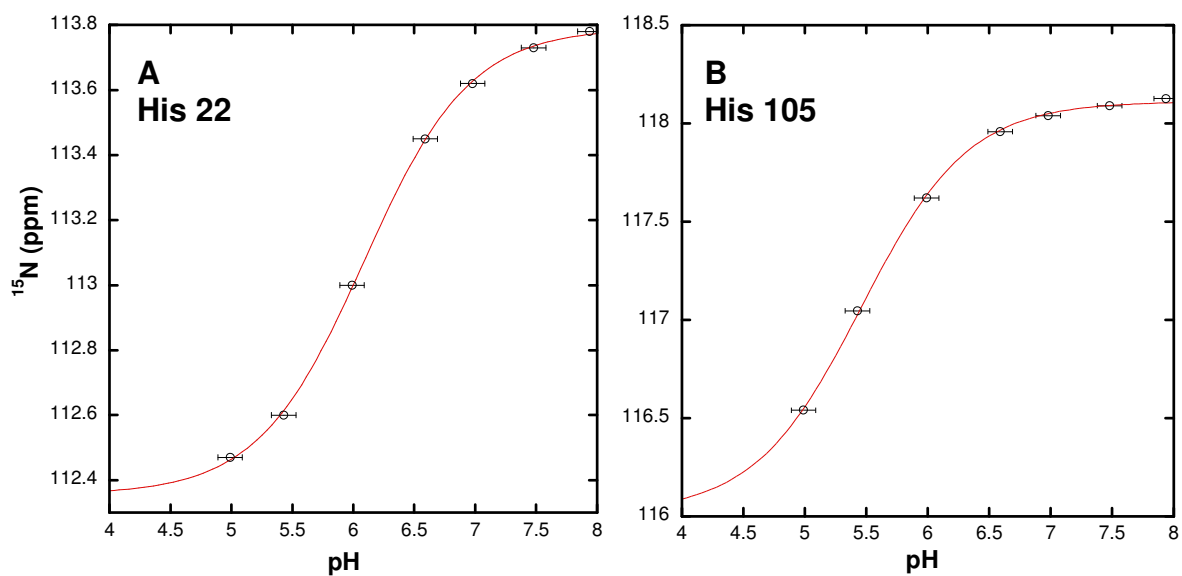

Figure S1: The titration curves of (A) His 22 and (B) His 105 residues in the P protein. Titration range is between pH 5 and pH 8. The nitrogen chemical shifts were obtained by  $^{15}\text{N}$  HSQC spectra. The red lines are the best fitting results using Henderson–Hasselbalch equation. The estimated pKa of His 22 and His 105 are  $6.08 \pm 0.16$  and  $5.65 \pm 0.17$ , respectively.
